# Supplementary material for: CoMoO4-modified hematite with oxygen vacancies for high-efficiency solar water splitting
Source: Royal Society of Chemistry journal article supplement (doi:10.1039/d3cp01192e), 2023-01-01
Supplement: d3cp01192e1.pdf [file d3cp01192e1.pdf]

## Supporting information

### **CoMoO<sub>4</sub> modified hematite with oxygen vacancy for high-efficiency solar water splitting**

Gaoteng Zhang<sup>1†</sup>, Cheng Lu<sup>1†</sup>, Chang Li<sup>1</sup>, Shuo Li<sup>1</sup>, Xiaoquan Zhao<sup>1</sup>, Kaiqi Nie<sup>2</sup>, Jiaou

Wang<sup>2</sup>, Kun Feng<sup>2\*</sup> and Jun Zhong<sup>2\*</sup>

<sup>1</sup> *Institute of Functional Nano and Soft Materials Laboratory (FUNSOM), Jiangsu Key Laboratory of Advanced Negative Carbon Technologies, Soochow University, Suzhou 215123, China.*

<sup>2</sup> *Institute of High Energy Physics, Chinese Academy of Sciences, Beijing 100049, China*

† These authors contribute equally to this work.

\* Corresponding authors.

*E-mail address: fengkun0520@163.com (Kun Feng), jzhong@suda.edu.cn (Jun Zhong)*

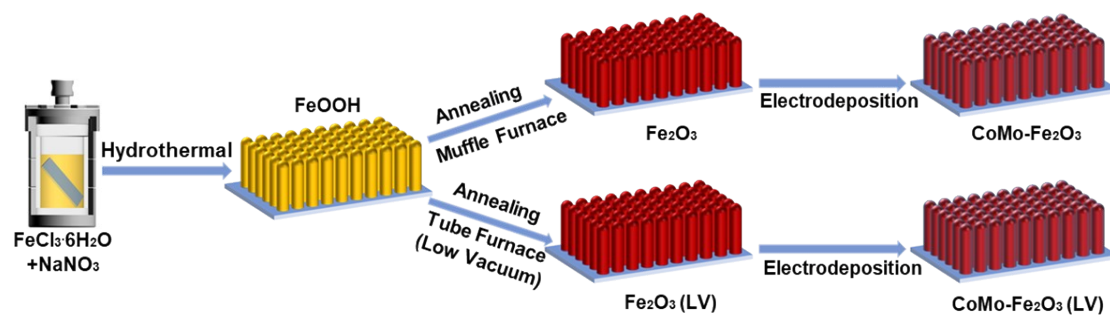

**Fig. S1.** Schematic illustration of the synthesis processes for  $\text{Fe}_2\text{O}_3$ ,  $\text{Fe}_2\text{O}_3$  (LV) and  $\text{CoMo-Fe}_2\text{O}_3$  (LV) photoanodes.

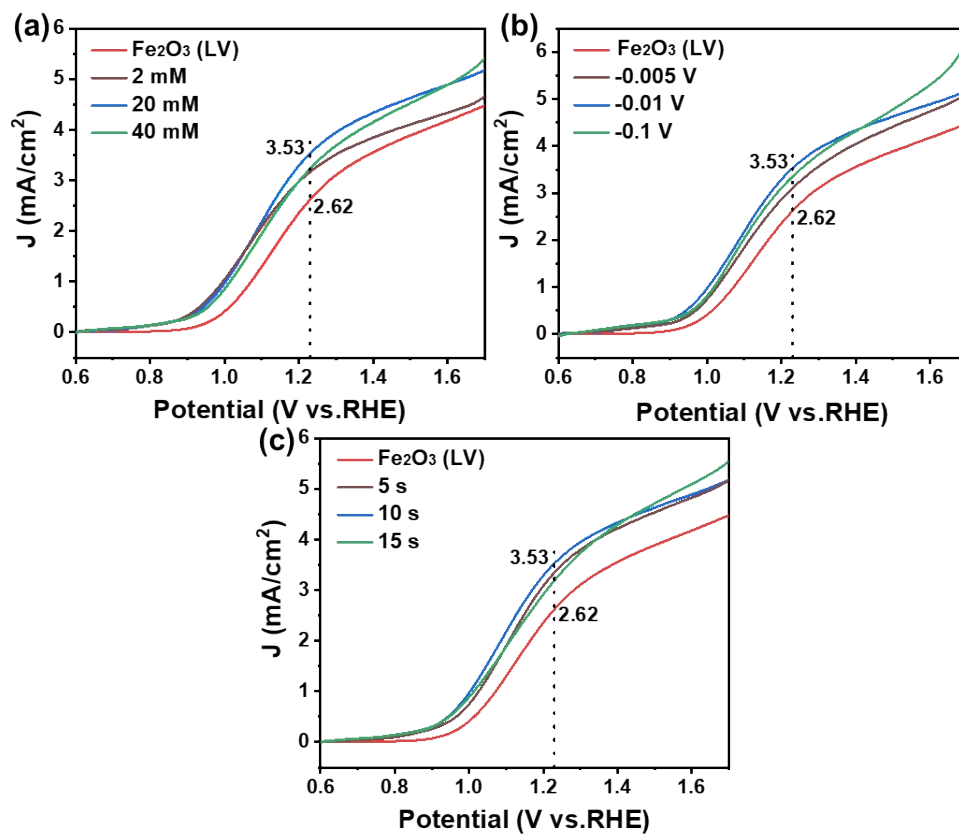

**Fig. S2.**  $J$ - $V$  curves of  $\text{CoMo-Fe}_2\text{O}_3$  (LV) photoanodes treated with (a) different precursor solution concentrations, (b) different deposition voltage and (c) different electrodeposition times.

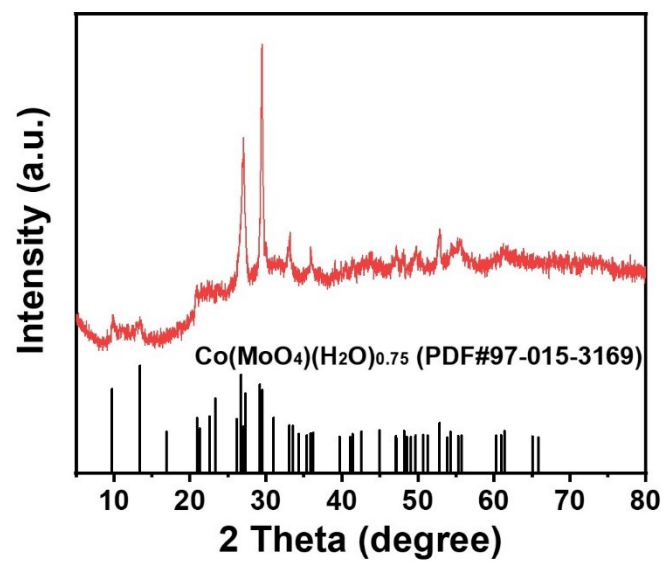

**Fig. S3.** XRD spectrum of  $\text{CoMoO}_4$  with a deposition time of 10 hours.

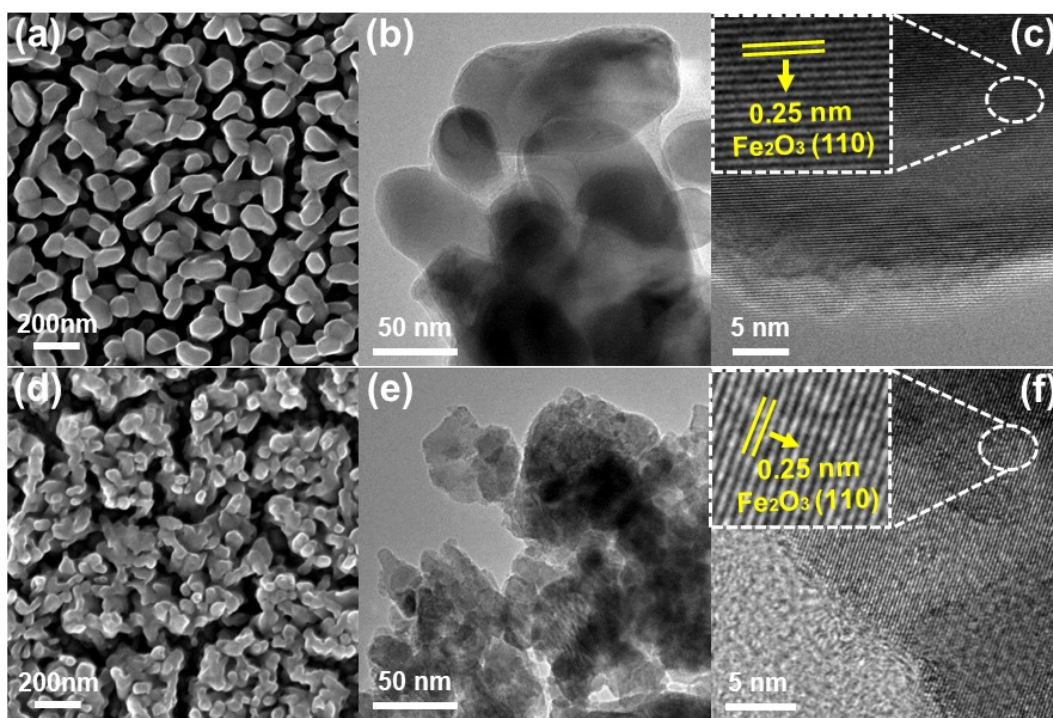

**Fig. S4.** (a) SEM, (b) TEM and (c) HRTEM images of  $\text{Fe}_2\text{O}_3$ . (d) SEM, (e) TEM and (f) HRTEM images of  $\text{Fe}_2\text{O}_3$  (LV).

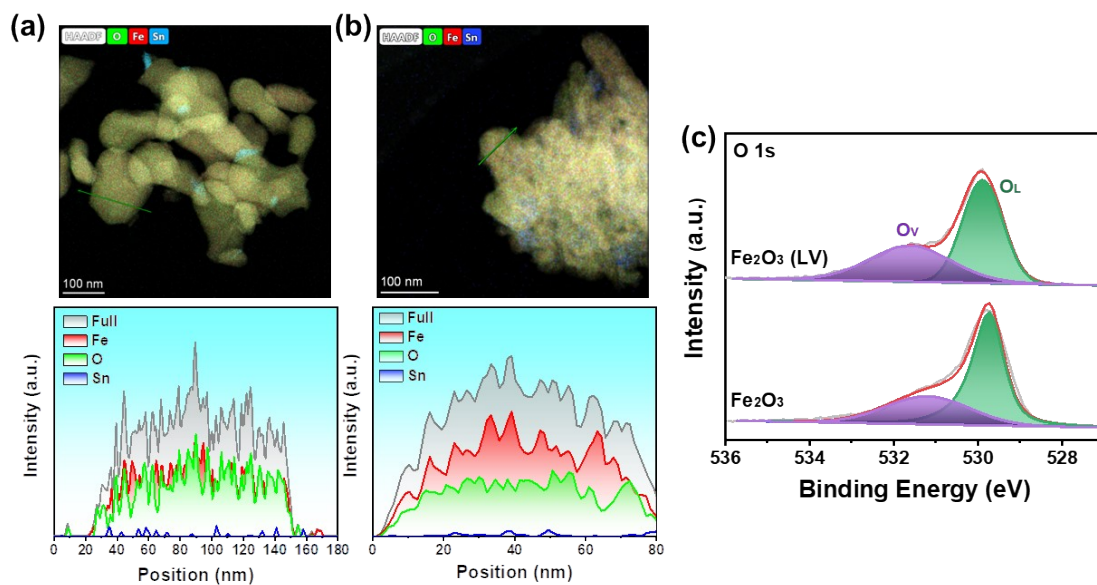

**Fig. S5.** TEM line scan analysis of (a) Fe<sub>2</sub>O<sub>3</sub> and (b) Fe<sub>2</sub>O<sub>3</sub> (LV) photoanodes. (c) O 1s high-resolution XPS spectra of Fe<sub>2</sub>O<sub>3</sub> and Fe<sub>2</sub>O<sub>3</sub> (LV) photoanodes.

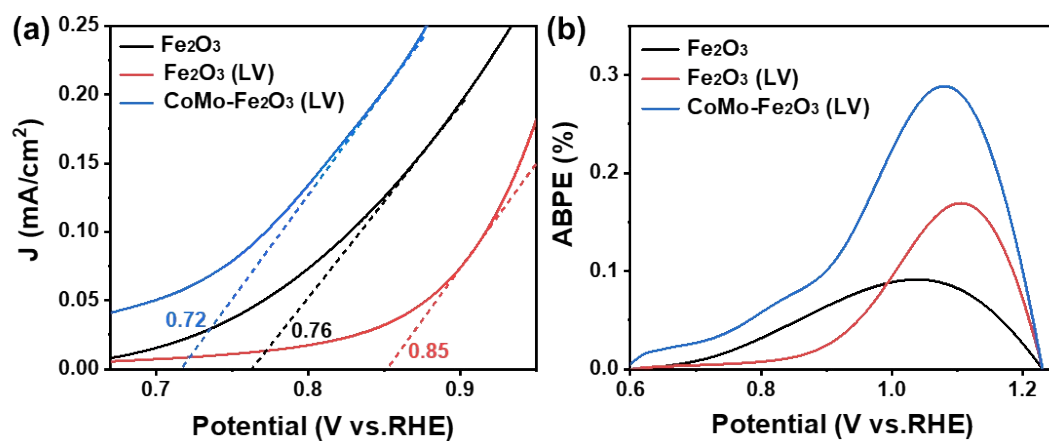

**Fig. S6.** (a) Magnified onset potential diagrams and (b) the ABPE curves of Fe<sub>2</sub>O<sub>3</sub>, Fe<sub>2</sub>O<sub>3</sub> (LV) and CoMo-Fe<sub>2</sub>O<sub>3</sub> (LV) photoanodes.

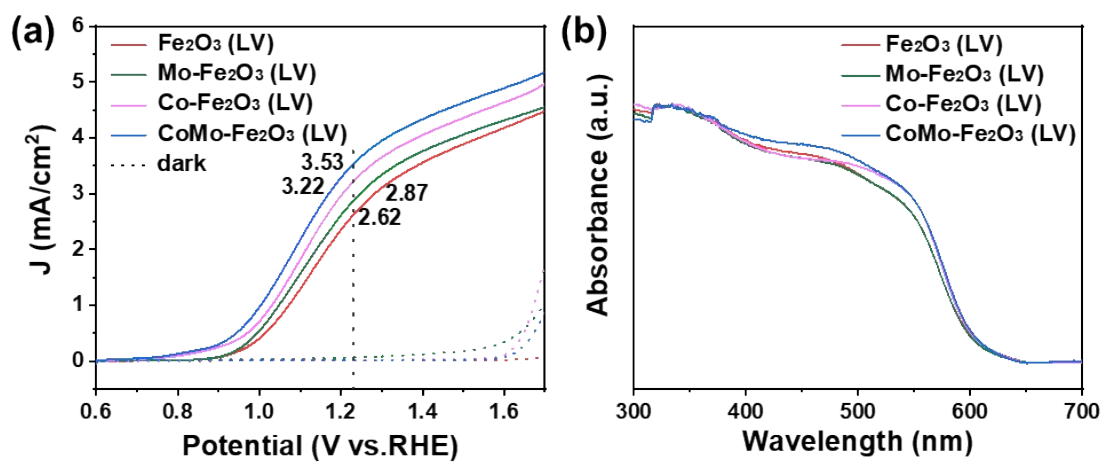

**Fig. S7.** (a)  $J$ - $V$  curves and (b) UV-visible absorption spectra of Fe<sub>2</sub>O<sub>3</sub> (LV), Mo-Fe<sub>2</sub>O<sub>3</sub> (LV), Co-Fe<sub>2</sub>O<sub>3</sub> (LV) and CoMo-Fe<sub>2</sub>O<sub>3</sub> (LV).



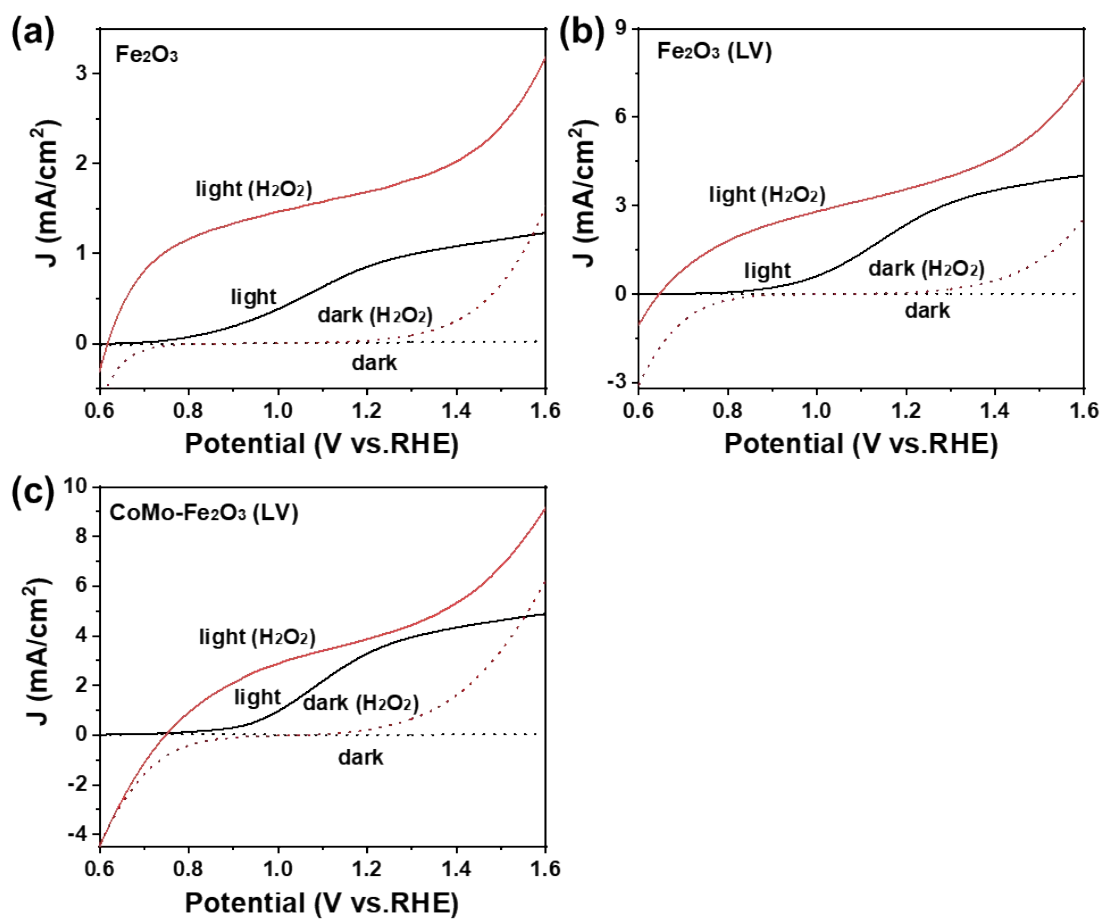

**Fig. S8.**  $J$ - $V$  curves with (red) and without (black)  $\text{H}_2\text{O}_2$  (0.5 M) for  $\text{Fe}_2\text{O}_3$  (a),  $\text{Fe}_2\text{O}_3$  (LV) (b) and CoMo- $\text{Fe}_2\text{O}_3$  (LV) (c), respectively.

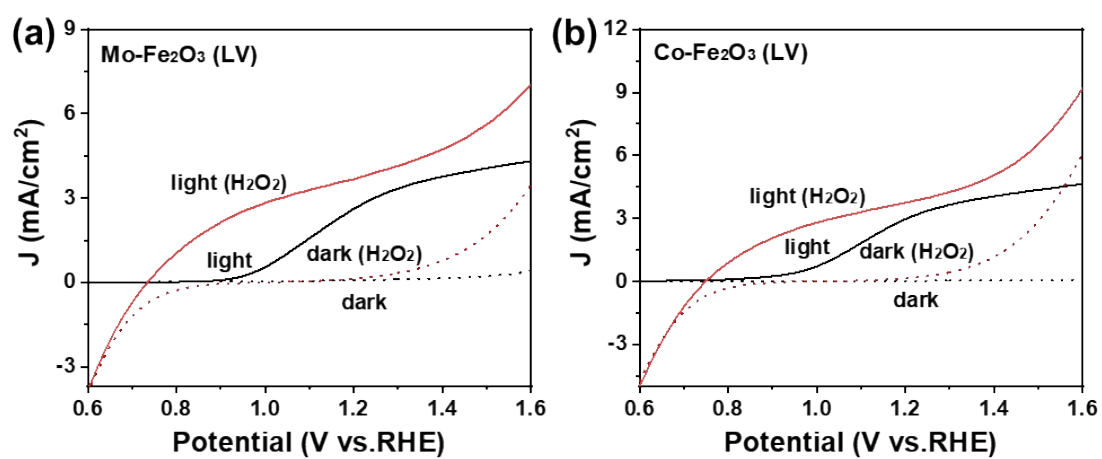

**Fig. S9.**  $J$ - $V$  curves with (red) and without (black) H<sub>2</sub>O<sub>2</sub> (0.5 M) for Mo-Fe<sub>2</sub>O<sub>3</sub> (LV) (a) and Co-Fe<sub>2</sub>O<sub>3</sub> (LV) (b), respectively.

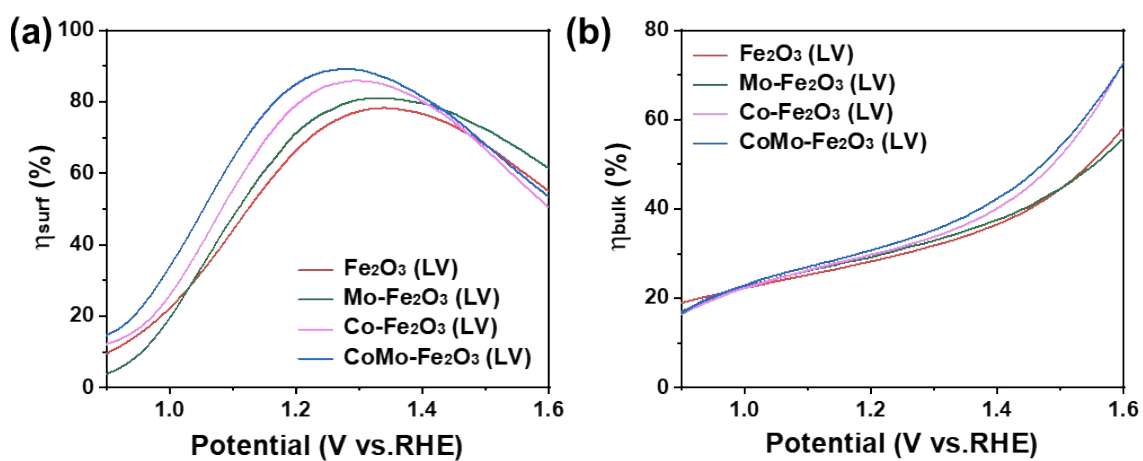

**Fig. S10.** (a) Surface charge separation efficiencies ( $\eta_{surface}$ ) and (b) bulk charge separation efficiencies ( $\eta_{bulk}$ ) of Fe<sub>2</sub>O<sub>3</sub> (LV), Mo-Fe<sub>2</sub>O<sub>3</sub> (LV), Co-Fe<sub>2</sub>O<sub>3</sub> (LV) and CoMo-Fe<sub>2</sub>O<sub>3</sub> (LV), respectively.

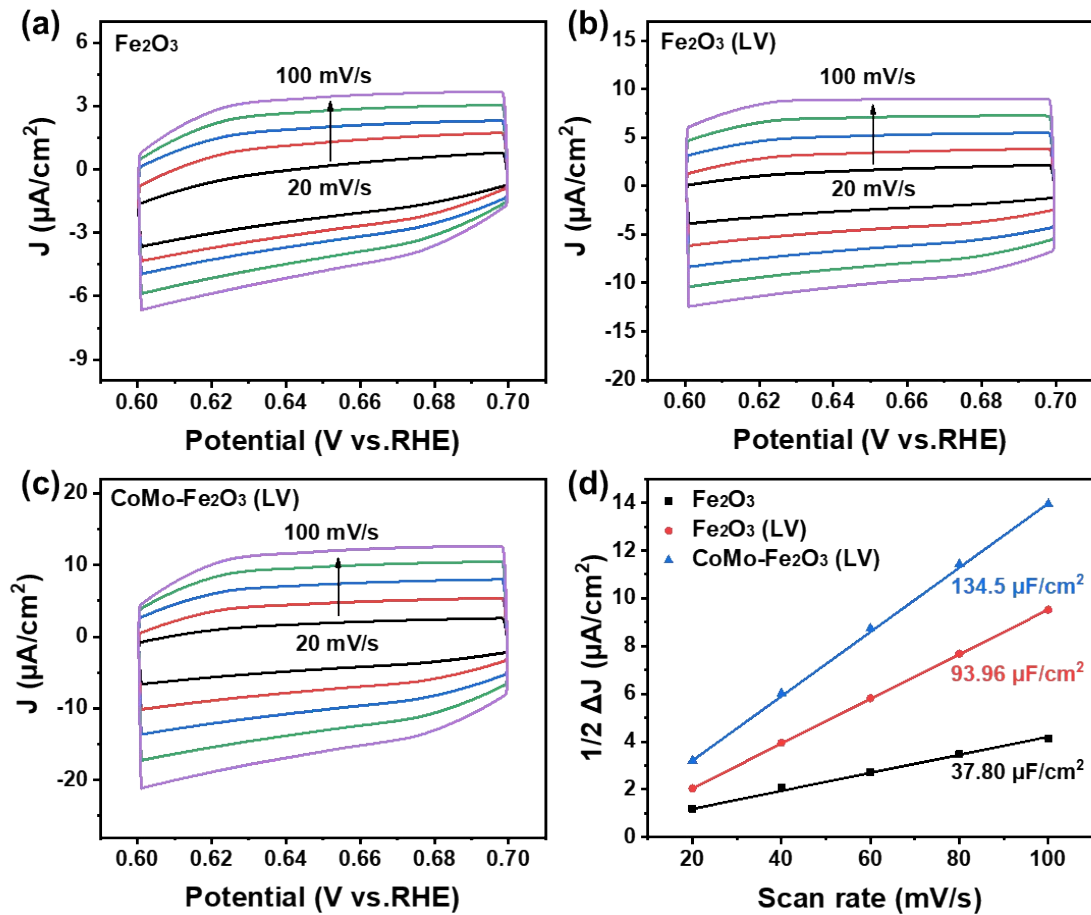

**Fig. S11.** CV curves recorded at different scan rates (20, 40, 60, 80, and 100 mV/s) for (a) Fe<sub>2</sub>O<sub>3</sub>, (b) Fe<sub>2</sub>O<sub>3</sub> (LV) and (c) CoMo-Fe<sub>2</sub>O<sub>3</sub> (LV) electrodes in the dark. (d) The average capacitive current against scan rate for Fe<sub>2</sub>O<sub>3</sub>, Fe<sub>2</sub>O<sub>3</sub> (LV) and CoMo-Fe<sub>2</sub>O<sub>3</sub> (LV) electrodes.

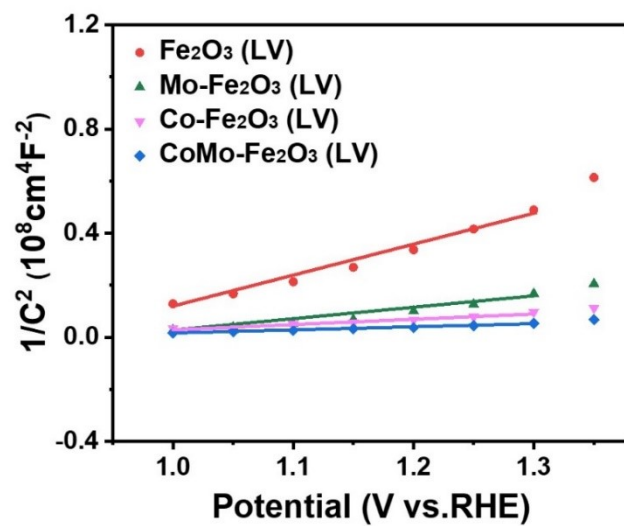

**Fig. S12.** Mott-Schottky plots of  $\text{Fe}_2\text{O}_3$  (LV),  $\text{Mo-Fe}_2\text{O}_3$  (LV),  $\text{Co-Fe}_2\text{O}_3$  (LV) and  $\text{CoMo-Fe}_2\text{O}_3$  (LV).

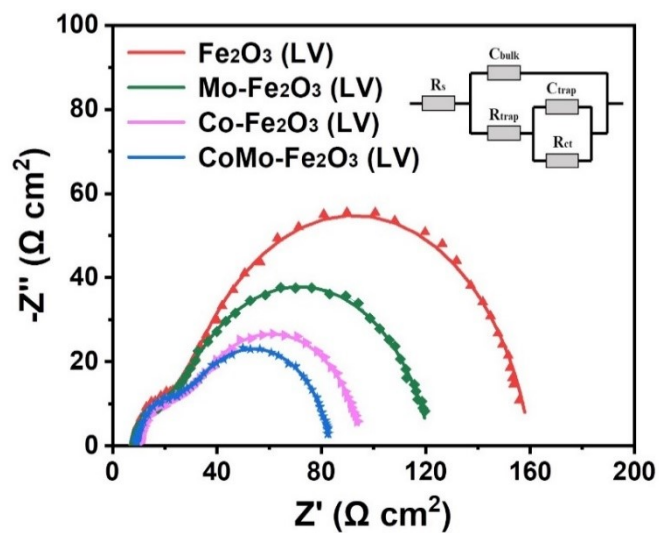

**Fig. S13.** EIS spectra of Fe<sub>2</sub>O<sub>3</sub> (LV), Mo-Fe<sub>2</sub>O<sub>3</sub> (LV), Co-Fe<sub>2</sub>O<sub>3</sub> (LV) and CoMo-Fe<sub>2</sub>O<sub>3</sub> (LV).

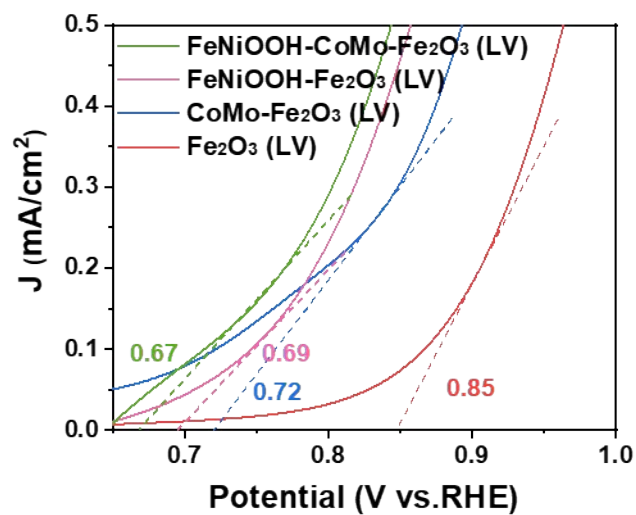

**Fig. S14.** Magnified onset potential diagrams of Fe<sub>2</sub>O<sub>3</sub> (LV), CoMo-Fe<sub>2</sub>O<sub>3</sub> (LV), FeNiOOH-Fe<sub>2</sub>O<sub>3</sub> (LV) and FeNiOOH-CoMo-Fe<sub>2</sub>O<sub>3</sub> (LV) photoanodes.

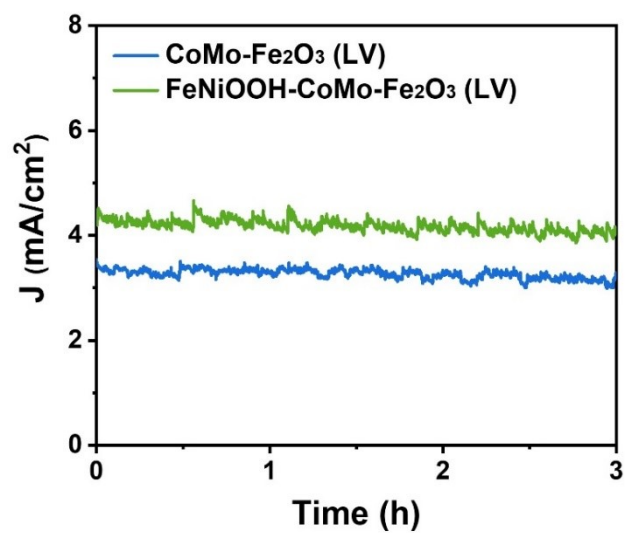

**Fig. S15.** Photochemical stability curves of CoMo-Fe<sub>2</sub>O<sub>3</sub> (LV) and FeNiOOH-CoMo-Fe<sub>2</sub>O<sub>3</sub> (LV) measured at 1.23 V<sub>RHE</sub>.



**Table S1.** Parameters of the equivalent circuit elements.

|                                              | $R_s$ ( $\Omega$ ) | $C_{\text{bulk}}$ ( $\mu\text{F}$ ) | $R_{\text{trap}}$ ( $\Omega$ ) | $C_{\text{trap}}$ (mF) | $R_{\text{ct}}$ ( $\Omega$ ) |
|----------------------------------------------|--------------------|-------------------------------------|--------------------------------|------------------------|------------------------------|
| <b>Fe<sub>2</sub>O<sub>3</sub> (LV)</b>      | <b>8.11±0.06</b>   | <b>65.14±6.81</b>                   | <b>24.02±0.80</b>              | <b>0.57±0.02</b>       | <b>128.00±1.50</b>           |
| <b>Mo-Fe<sub>2</sub>O<sub>3</sub> (LV)</b>   | <b>8.34±0.04</b>   | <b>101.60±9.63</b>                  | <b>19.96±0.65</b>              | <b>0.90±0.02</b>       | <b>93.65±1.00</b>            |
| <b>Co-Fe<sub>2</sub>O<sub>3</sub> (LV)</b>   | <b>10.11±0.05</b>  | <b>105.80±9.54</b>                  | <b>23.17±0.70</b>              | <b>1.08±0.03</b>       | <b>62.74±0.99</b>            |
| <b>CoMo-Fe<sub>2</sub>O<sub>3</sub> (LV)</b> | <b>8.99±0.04</b>   | <b>121.10±9.82</b>                  | <b>25.56±0.77</b>              | <b>0.99±0.04</b>       | <b>48.89±0.92</b>            |

**Table S2.** Comparison of the photocurrents on hematite-based photoanodes (at 1.23 V<sub>RHE</sub>).

| Electrodes                                                                               | Solutions                 | J (mA/cm <sup>2</sup> ) | Reference        |
|------------------------------------------------------------------------------------------|---------------------------|-------------------------|------------------|
| <b>FeNiOOH-CoMo-Fe<sub>2</sub>O<sub>3</sub> (LV)</b>                                     | <b>1 M NaOH (pH 13.6)</b> | <b>4.18</b>             | <b>This work</b> |
| FH/TH/Co                                                                                 | 1 M NaOH (pH 13.6)        | 6.0                     | (1)              |
| NiFeO <sub>x</sub> @Ge-PH                                                                | 1 M NaOH (pH 13.6)        | 4.60                    | (2)              |
| NiFeO <sub>x</sub> /Si:Ti-Fe <sub>2</sub> O <sub>3</sub>                                 | 1 M NaOH (pH 13.6)        | 4.30                    | (3)              |
| Ti:Fe <sub>2</sub> O <sub>3</sub> /SiO <sub>x</sub> /Ti-FeOOH                            | 1 M NaOH (pH 13.6)        | 4.06                    | (4)              |
| NiFeO <sub>x</sub> /Ti:Si-Fe <sub>2</sub> O <sub>3</sub><br>(Dual photoanode)            | 1 M NaOH (pH 13.6)        | 4.00                    | (5)              |
| Fe <sub>2</sub> O <sub>3</sub> -MA-18 min                                                | 1 M NaOH (pH 13.6)        | 3.90                    | (6)              |
| Co-Pi/Sn-Fe <sub>2</sub> O <sub>3</sub>                                                  | 1 M NaOH (pH 13.6)        | 3.90                    | (7)              |
| IrO <sub>2</sub> /Fe <sub>2</sub> O <sub>3</sub>                                         | 1 M NaOH (pH 13.6)        | 3.75                    | (8)              |
| F/Sn: Fe <sub>2</sub> O <sub>3</sub>                                                     | 1 M NaOH (pH 13.6)        | 3.64                    | (9)              |
| NiFeO <sub>x</sub> /P,Ti-Fe <sub>2</sub> O <sub>3</sub>                                  | 1 M NaOH (pH 13.6)        | 3.54                    | (10)             |
| Co-Pi/Mn-Fe <sub>2</sub> O <sub>3</sub>                                                  | 1 M NaOH (pH 13.6)        | 3.50                    | (11)             |
| Ti-Fe <sub>2</sub> O <sub>3</sub> MC/Co-Pi                                               | 1 M NaOH (pH 13.6)        | 3.50                    | (12)             |
| InO <sub>2</sub> layer / Fe <sub>2</sub> O <sub>3</sub>                                  | 1 M NaOH (pH 13.6)        | 3.40                    | (13)             |
| CoPi-Ti/Au/ Fe <sub>2</sub> O <sub>3</sub>                                               | 1 M NaOH (pH 13.6)        | 3.39                    | (14)             |
| Sn:Fe <sub>2</sub> O <sub>3</sub> with V <sub>O</sub>                                    | 1 M NaOH (pH 13.6)        | 3.30                    | (15)             |
| NiFe(OH) <sub>x</sub> /Ta:Fe <sub>2</sub> O <sub>3</sub> @Fe <sub>2</sub> O <sub>3</sub> | 1 M NaOH (pH 13.6)        | 3.22                    | (16)             |
| Fe <sub>2</sub> O <sub>3</sub> /FeOOH/Au                                                 | 1 M KOH (pH 13.6)         | 3.20                    | (17)             |
| Ti:Fe <sub>2</sub> O <sub>3</sub> /SiO <sub>x</sub> /Co-Pi                               | 1 M NaOH (pH 13.6)        | 3.19                    | (18)             |
| Co-Pi/(3D) Ti-Fe <sub>2</sub> O <sub>3</sub> /NTO                                        | 1 M NaOH (pH 13.6)        | 3.16                    | (19)             |
| Fe <sub>2</sub> O <sub>3</sub> /TiO <sub>2</sub> /FeOOH                                  | 1 M KOH (pH 13.6)         | 3.15                    | (20)             |
| Fe <sub>2</sub> O <sub>3</sub> /SiMWs                                                    | 1 M NaOH (pH 13.6)        | 3.12                    | (21)             |
| P:Fe <sub>2</sub> O <sub>3</sub> /Co-Pi                                                  | 1 M NaOH (pH 13.6)        | 3.10                    | (22)             |
| TiO <sub>2</sub> /Ti: Fe <sub>2</sub> O <sub>3</sub> BNR/FeOOH                           | 1 M KOH (pH 13.6)         | 3.10                    | (23)             |
| Sb <sub>2</sub> Se <sub>3</sub> -Fe <sub>2</sub> O <sub>3</sub>                          | 1 M NaOH (pH 13.6)        | 3.07                    | (24)             |
| CoPi-Ti :Fe <sub>2</sub> O <sub>3</sub>                                                  | 1 M NaOH (pH 13.6)        | 3.05                    | (25)             |
| Co-Pi/CQDs/Fe <sub>2</sub> O <sub>3</sub> /TiO <sub>2</sub>                              | 1 M NaOH (pH 13.6)        | 3.00                    | (26)             |
| Ni <sub>2</sub> P/Ta:α-Fe <sub>2</sub> O <sub>3</sub>                                    | 1 M KOH (pH 13.6)         | 2.98                    | (27)             |
| A:Ce-Fe <sub>2</sub> O <sub>3</sub> @Fe <sub>2</sub> O <sub>3</sub>                      | 1 M KOH (pH 13.6)         | 2.50                    | (28)             |
| Cu@α-Fe <sub>2</sub> O <sub>3</sub> -Vo-pn                                               | 1 M KOH (pH 13.6)         | 2.49                    | (29)             |

## References :

- 1 T. Jeon, G. Moon, H. Park and W. Choi, *Nano Energy*, 2017, **39**, 211-218.
- 2 K. Yoon, J. Park, M. Jung, S. Ji, H. Lee, J. Seo, M. Kwak, S. Seok, J. Lee and J. Jang, *Nat. Commun.*, 2021, **12**, 4309.
- 3 K. Yoon, J. Park, H. Lee, J. Seo, M. Kwak, J. Lee and J. Jang, *ACS Catal.*, 2022, **12**, 5112-5122.
- 4 K. Yoon, H. Ahn, M. Kwak, S. Kim, J. Park and J. Jang, *J. Mater. Chem. A*, 2016, **4**, 18730-18736.
- 5 J. Park, K. Yoon, T. Kim, H. Jang, M. Kwak, J. Kim and J. Jang, *Nano Energy*, 2020, **76**, 105089.
- 6 Y. Hou, C. Zheng, Z. Zhu and X. Wang, *Chem. Commun.*, 2016, **52**, 6888-6891.
- 7 Gurudayal, R. John, P. Boix, C. Yi, C. Shi, M. Scott, S. Veldhuis, A. Minor, S. Zakeeruddin, L. Wong, M. Grätzel and N. Mathews, *ChemSusChem*, **2017**, **10**, 2449-2456.
- 8 S. Tilley, M. Cornuz, K. Sivula and M. Gratzel, *Angew. Chem. Int. Ed.*, 2010, **49**, 6405-6408.
- 9 N. Quang, P. Van, D. Le, S. Majumder, N. Chinh, J. Jeong, C. Kim and D. Kim, *Appl. Surf. Sci.*, 2021, **558**, 149898.
- 10 J. Kang, K. Yoon, J. Lee, J. Park, S. Chaule and J. Jang, *Nano Energy*, 2023, **107**, 108090.
- 11 Gurudayal, D. Sabba, M. Kumar, L. Wong, J. Barber, M. Grätzel and N. Mathews, *Nano Lett.*, 2015, **15**, 3833-3839.
- 12 Z. Zhang, I. Karimata, H. Nagashima, S. Muto, K. Ohara, K. Sugimoto and T. Tachikawa, *Nat. Commun.*, 2019, **10**, 4832.
- 13 S. Yi, Z. Wang, H. Li, Z. Zafar, Z. Zhang, L. Zhang, D. Chen, Z. Liu and X. Yue, *Appl. Catal. B: Environ.*, 2021, **283**, 119649.
- 14 J. Li, Y. Qiu, Z. Wei, Q. Lin, Q. Zhang, K. Yan, H. Chen, S. Xiao, Z. Fan and S. Yang, *Energy Environ. Sci.*, 2014, **7**, 3651-3658.
- 15 J. Wang, Y. Hu, R. Toth, G. Fortunato and A. Braun, *J. Mater. Chem. A*, 2016, **4**, 2821-2825.
- 16 H. Zhang, D. Li, W. Byun, X. Wang, T. Shin, H. Jeong, H. Han, C. Li and J. Lee, *Nat. Commun.*, 2020, **11**, 4622.
- 17 L. Wang, H. Hu, N. Nguyen, Y. Zhang, P. Schmuki and Y. Bi, *Nano Energy*, 2017, **35**, 171-

178.

- 18 H. Ahn, K. Yoon, M. Kwak and J. Jang, *Angew. Chem. Int. Ed.*, 2016, **55**, 9922-9926.
- 19 K. Yan, Y. Qiu, S. Xiao, J. Gong, S. Zhao, J. Xu, X. Meng, S. Yang and J. Xu, *Mater. Today Energy*, 2017, **6**, 128-135.
- 20 F. Feng, C. Li, J. Jian, X. Qiao, H. Wang and L. Jia, *Chem. Eng. J.*, 2019, **368**, 959-967.
- 21 Z. Zhou, S. Wu, L. Qin, L. Li, L. Li and X. Li, *J. Mater. Chem. A*, 2018, **6**, 15593-15602.
- 22 Y. Zhang, S. Jiang, W. Song, P. Zhou, H. Ji, W. Ma, W. Hao, C. Chen and J. Zhao, *Energy Environ. Sci.*, 2015, **8**, 1231-1236.
- 23 Z. Luo, T. Wang, J. Zhang, C. Li, H. Li and J. Gong, *Angew. Chem. Int. Ed.*, 2017, **56**, 12878-12882.
- 24 A. Liao, Y. Zhou, L. Xiao, C. Zhang, C. Wu, A. Asiri, M. Xiao and Z. Zou, *Nanoscale*, 2019, **11**, 109-114.
- 25 Y. Qiu, S. Leung, Q. Zhang, B. Hua, Q. Lin, Z. Wei, K. Tsui, Y. Zhang, S. Yang and Z. Fan, *Nano Lett.*, 2014, **14**, 2123-2129.
- 26 X. Hu, J. Huang, F. Zhao, P. Yi, B. He, Y. Wang, T. Chen, Y. Chen, Z. Li and X. Liu, *J. Mater. Chem. A*, 2020, **8**, 14915-14920.
- 27 X. Cao, P. Wen, R. Ma, Y. Liu, S. Sun, Q. Ma, P. Zhang and Y. Qiu, *Chem. Eng. J.*, 2022, **449**, 137792.
- 28 J. Bai, R. Gao, X. Guo, J. He, X. Liu, X. Zhang and L. Wang, *Chem. Eng. J.*, 2022, **448**, 137602.
- 29 H. Wang, Y. Hu, G. Song and D. Zheng, *Chem. Eng. J.*, 2022, **435**, 135016.
